# Supplementary material for: Flow-through TiO2 nanotube arrays: a modified support with homogeneous distribution of Ag nanoparticles and their photocatalytic activities
Source: Royal Society of Chemistry journal article supplement (doi:10.1039/c2nj41011g), 2012-12-18
Supplement: c2nj41011g.pdf [file c2nj41011g.pdf]

## Electronic Supplementary Information

### Flow-through TiO<sub>2</sub> Nanotube Arrays: A Modified Supporter with Homogeneous Distribution of Ag Nanoparticles and Their Photocatalytic Activities

Haidong Bian,<sup>a, b</sup> Yan Wang,<sup>a, b</sup> Bao Yuan,<sup>a, b</sup> Jiewu Cui,<sup>a, b</sup> Xia Shu,<sup>a, b</sup> Yucheng Wu,<sup>\*a, b</sup>  
Xinyi Zhan,<sup>a, b</sup> and Sam Adeloju<sup>c</sup>

<sup>a</sup>Laboratory of Functional Nanomaterials and Devices, Hefei University of Technology, Hefei 230009, China

<sup>b</sup>School of Materials Science and Engineering, Hefei University of Technology, Hefei 230009, China

<sup>c</sup>School of Applied Science and Engineering, Monash University, Gippsland Campus, Churchill, Victoria 3842, Australia

\*To whom correspondence should be addressed. E-mail address: ycwu@hfut.edu.cn

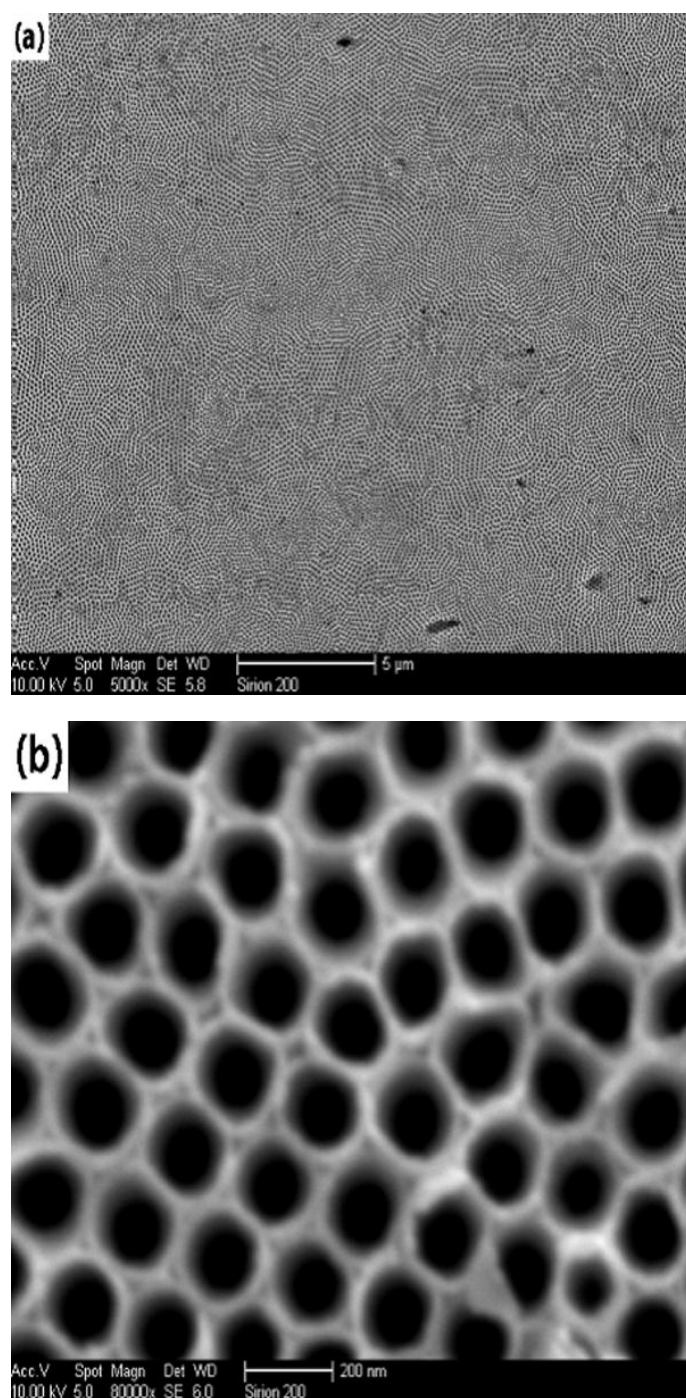

Figure S1. The overall (a) and magnified (b) SEM images showing the bottom morphology of modified f-TNTAs (breakdown at 140 V for 120 s, then anodization under 5 V for 60s).

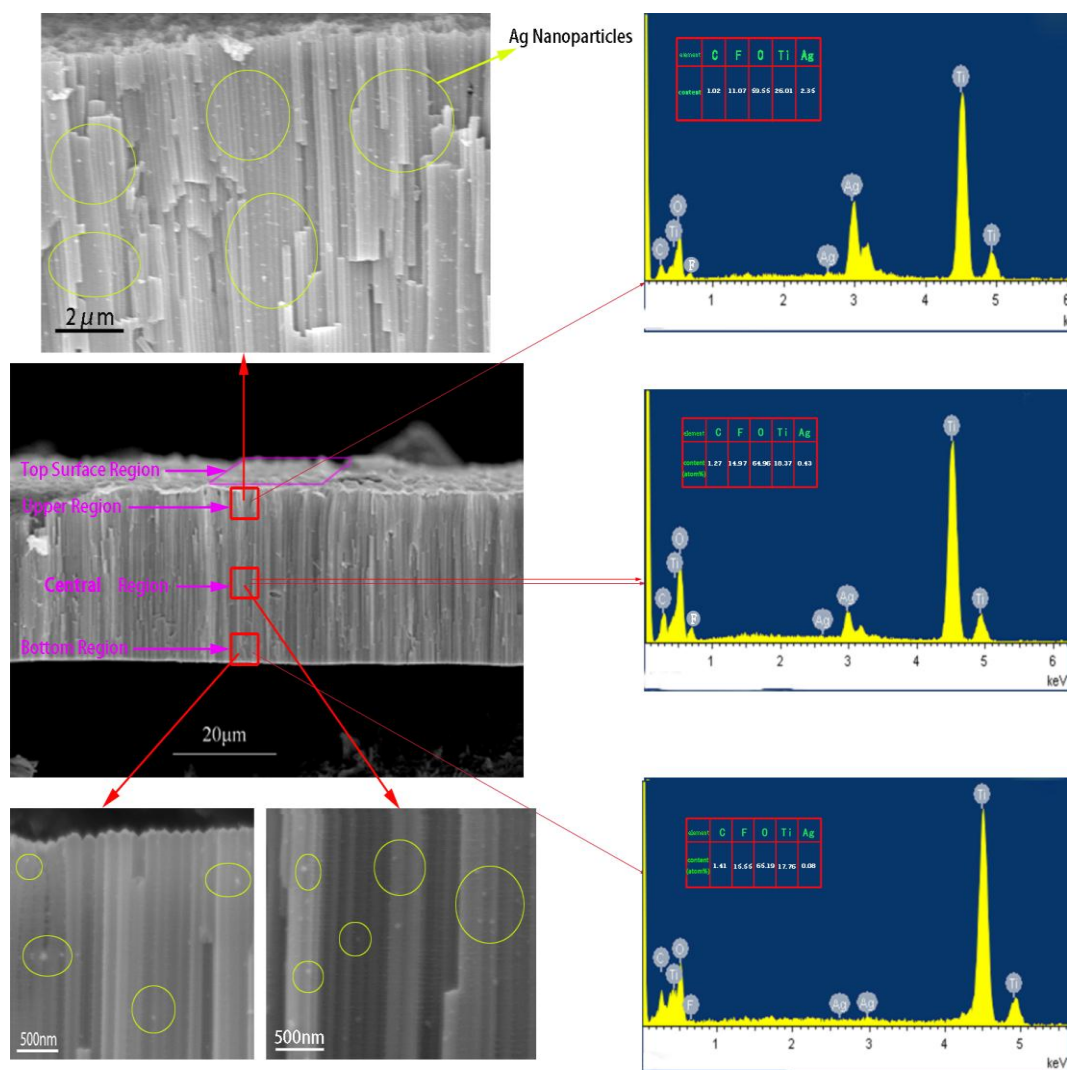

Figure S2. SEM images of the distribution of Ag NPs in the different regions of c-TNTAs (the central and bottom region only show sporadic Ag NPs), the right part showing the corresponding EDX results of the different regions.

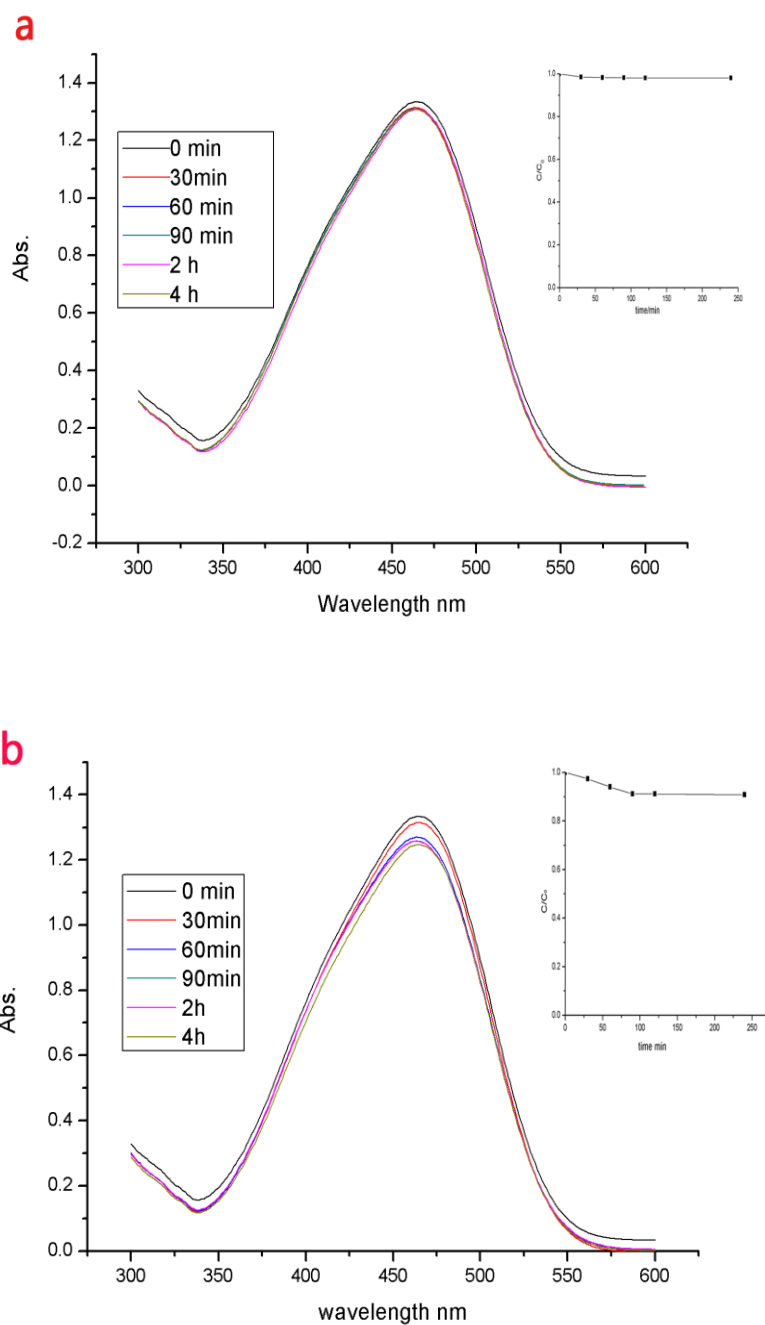

Figure S3. The absorption spectra of c-TNTA (a) and f-TNTA (b) in dark at room temperature. The insert pictures are the corresponding concentration change of MO. It obviously shows the absorption property of f-TNTA is much better than that of c-TNTA. This is due to the flowability of f-TNTA and allows more active sites to absorb dye. While for c-TNTA, the nanotube is sealed at one end, inhibits the dye to fully wet the nanotubes and causes a low absorption of dye.

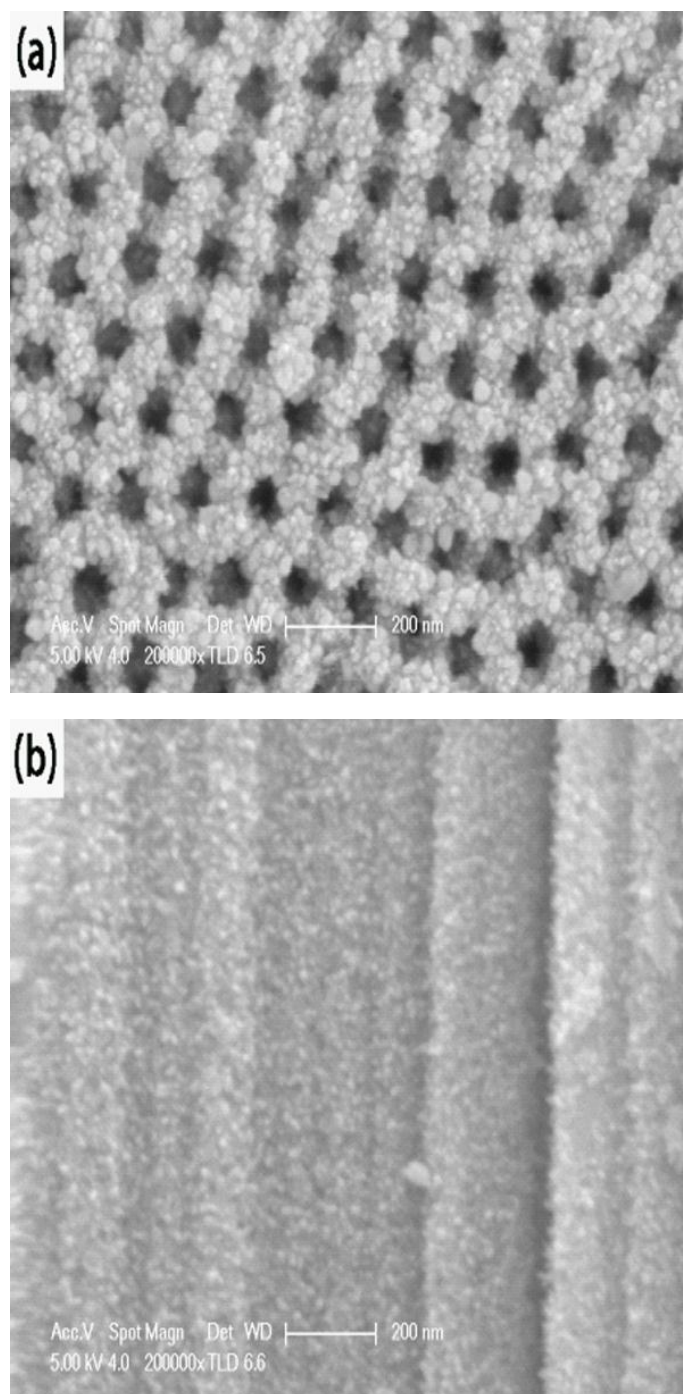

Figure S4. The top surface (a) and cross-sectional (b) SEM images of Ag NPs decorated f-TNTAs (f-TNTAs were immersed in  $\text{AgNO}_3$  for 1 h). The Ag NPs get coarsen and aggregated on the top surface of TNTAs.

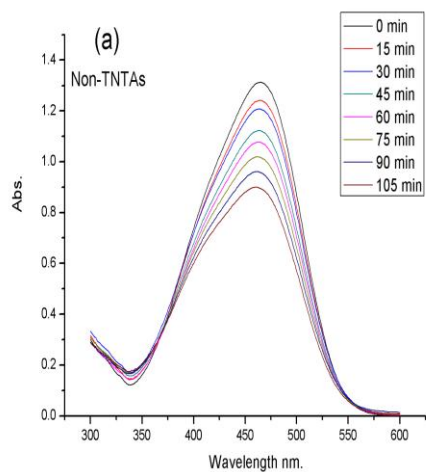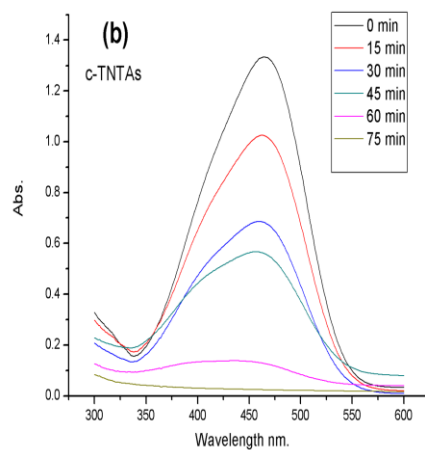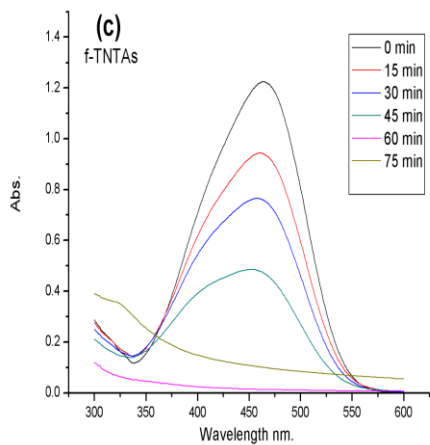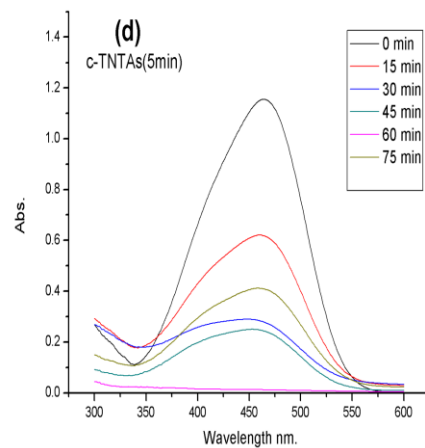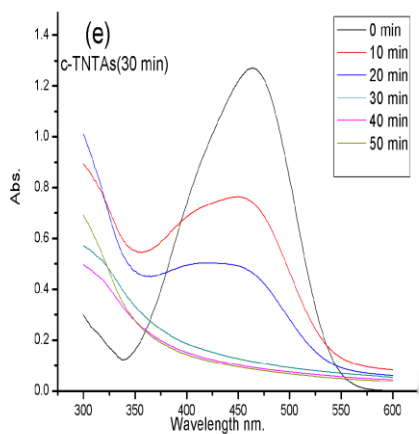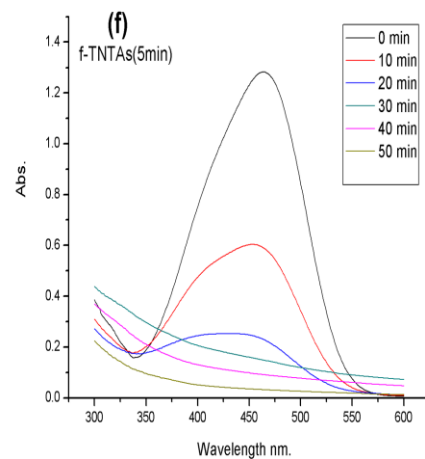

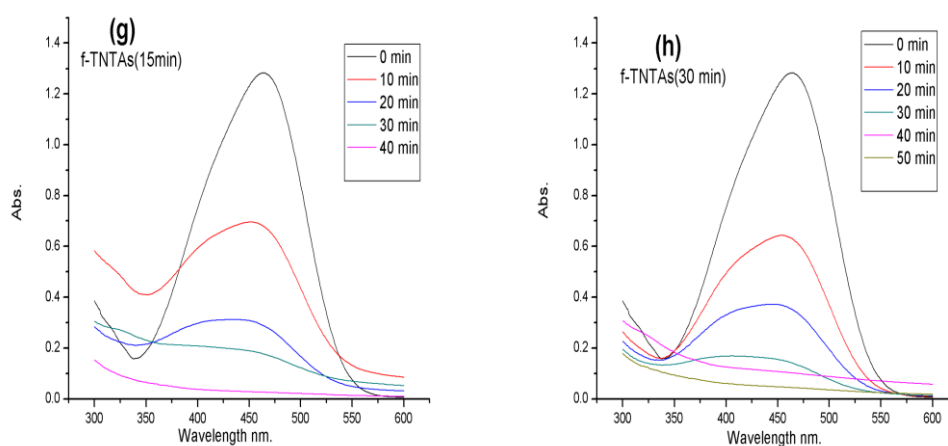

Figure S5. Absorption spectra of MO during the photodegradation process over various photocatalysts under UV light. (a): a blank experiment where no catalysts are used; (b) and (c): bare c-TNTAs and f-TNTAs are used as reference catalysts; (d) and (e) are c-TNTAs catalysts with immersed in  $\text{AgNO}_3$  for 5 min and 30 min, respectively; (f), (g) and (h) are f-TNTAs catalysts with immersed in  $\text{AgNO}_3$  for 5 min, 15 min and 30 min, respectively.

Table S1. The silver content of different regions of annealed Ag-NPs/TNTAs samples from the EDX results.

| Sample No. | Impregnation time(min) | The top surface region | The upper region | The intermediate region | The bottom region |
|------------|------------------------|------------------------|------------------|-------------------------|-------------------|
| 1          | 5                      | 1.42 at. %             | 0.87 at. %       | 0.53 at. %              | 0.45 at. %        |
| 2          | 15                     | 2.6 at. %              | 1.76 at. %       | 1.02 at. %              | 1.37 at. %        |
| 3          | 30                     | 3.2 at. %              | 2.21 at. %       | 1.41 at. %              | 1.23 at. %        |
| 4          | 60                     | 5.03 at. %             | 3.29 at. %       | 3.39 at. %              | 1.45 at. %        |
| 5          | 5                      | 0.99 at. %             | 0.53 at. %       | 0.38 at. %              | 0.04 at. %        |
| 6          | 30                     | 2.78 at. %             | 2.35 at. %       | 0.43 at. %              | 0.08 at. %        |
